# Supplementary material for: On the making of aromatic organometallic superalkali complexes
Source: Royal Society of Chemistry journal article supplement (doi:10.1039/c8cc01170b), 2018-01-01
Supplement: c8cc01170b1.pdf [file c8cc01170b1.pdf]

***Supporting Information:***

**On the Making of Aromatic Organometallic Superalkali Complexes**

Rakesh Parida<sup>a</sup>, G Naresh Reddy<sup>a</sup>, Anirban Ganguly<sup>a,d</sup>, Gourisankar Roymahapatra<sup>b</sup>,  
Arindam Chakraborty<sup>c</sup> and Santanab Giri<sup>\*a</sup>

<sup>a</sup>*Department of Chemistry, National Institute of Technology, Rourkela, Orissa 769008, India.*

<sup>b</sup>*Department of Applied Sciences, Haldia Institute of Technology, Haldia, West Bengal 721657, India.*

<sup>c</sup>*Faculty of Science, Jatragachi Pranabananda High School, New Town, Kolkata, 700161, India*

<sup>d</sup>*Department of Chemistry, National Institute of Technology, Agartala (Visit to NIT Rourkela in Summer Internship)*

**Email:** [giris@nitrkl.ac.in](mailto:giris@nitrkl.ac.in)

**S1: Neutral Optimized geometries and Cartesian Coordinates of Pyridine and Imidazole, Au<sub>3</sub>, Au<sub>3</sub>L<sub>1</sub> and Au<sub>3</sub>L<sub>3</sub> (L : IMD, Py)**

**Pyridine (Py)**

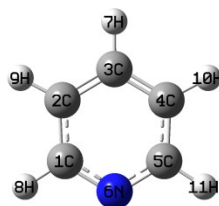

|   |             |             |             |
|---|-------------|-------------|-------------|
| C | -1.13471500 | -0.71823000 | -0.00019700 |
| C | -1.19067400 | 0.66824200  | -0.00011700 |
| C | -0.00002100 | 1.37628400  | 0.00008400  |
| C | 1.19065300  | 0.66828000  | 0.00021000  |
| C | 1.13473700  | -0.71819300 | 0.00010500  |
| N | 0.00002200  | -1.40933300 | -0.00009800 |
| H | -0.00004400 | 2.46061100  | 0.00015700  |
| H | -2.05084700 | -1.30310900 | -0.00036700 |
| H | -2.14773400 | 1.17626200  | -0.00020800 |
| H | 2.14770200  | 1.17632000  | 0.00039000  |
| H | 2.05088600  | -1.30304600 | 0.00020300  |

**Imidazole (IMD)**

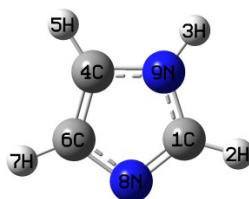

|   |             |             |             |
|---|-------------|-------------|-------------|
| C | 0.97719200  | -0.54488100 | 0.00000400  |
| H | 1.96961900  | -0.97063700 | 0.00000500  |
| H | 1.46013900  | 1.51117300  | 0.00000600  |
| C | -0.59662600 | 0.98420600  | -0.00000400 |
| H | -1.04007700 | 1.96580700  | -0.00000600 |
| C | -1.13302400 | -0.27140200 | 0.00000700  |
| H | -2.17654900 | -0.54596400 | 0.00001000  |
| N | -0.14418600 | -1.21613100 | -0.00000800 |
| N | 0.75870300  | 0.79214300  | -0.00000100 |

**Au<sub>3</sub>**

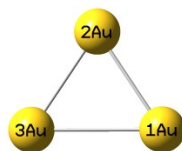

|    |             |             |            |
|----|-------------|-------------|------------|
| Au | 1.45541600  | -0.72350100 | 0.00000000 |
| Au | 0.00000000  | 1.44699100  | 0.00000000 |
| Au | -1.45541600 | -0.72349000 | 0.00000000 |

**Au<sub>3</sub>(Py)<sub>1</sub>**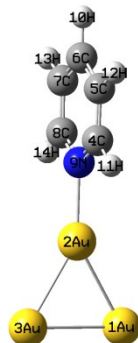

|    |             |             |             |
|----|-------------|-------------|-------------|
| Au | -1.51232900 | 1.35815500  | 0.00010900  |
| Au | 0.76159800  | -0.00092800 | -0.00023600 |
| Au | -1.51344000 | -1.35729500 | 0.00003300  |
| C  | 3.54303900  | 0.00006300  | -1.15048300 |
| C  | 4.92359300  | 0.00054800  | -1.19028900 |
| C  | 5.63172200  | 0.00059800  | 0.00032900  |
| C  | 4.92332900  | 0.00016400  | 1.19079000  |
| C  | 3.54278300  | -0.00030100 | 1.15067500  |
| N  | 2.85798600  | -0.00035200 | 0.00001900  |
| H  | 6.71521200  | 0.00096700  | 0.00044900  |
| H  | 2.95339300  | 0.00002400  | -2.05822200 |
| H  | 5.42786100  | 0.00087500  | -2.14815500 |
| H  | 5.42738400  | 0.00018700  | 2.14876800  |
| H  | 2.95293800  | -0.00066900 | 2.05828300  |

**Au<sub>3</sub>(Py)<sub>3</sub>**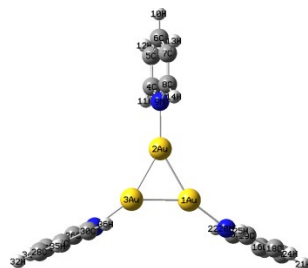

|    |             |             |             |
|----|-------------|-------------|-------------|
| Au | 1.39615600  | -0.63188300 | -0.00396300 |
| Au | -0.11704700 | 1.50837700  | 0.00357700  |
| Au | -1.27845200 | -0.84058700 | 0.00187700  |
| C  | -0.32611900 | 4.29328600  | -1.15234900 |
| C  | -0.44076400 | 5.66269400  | -1.18898800 |
| C  | -0.51394100 | 6.38317500  | 0.00245800  |
| C  | -0.46562800 | 5.66105800  | 1.19416200  |
| C  | -0.35016800 | 4.29160900  | 1.15794300  |
| N  | -0.27964800 | 3.58950400  | 0.00287700  |
| H  | -0.60469700 | 7.46177100  | 0.00219000  |
| H  | -0.26754300 | 3.71147800  | -2.06339900 |
| H  | -0.47225800 | 6.16146700  | -2.15008900 |
| H  | -0.51734100 | 6.15838600  | 2.15513700  |
| H  | -0.31035200 | 3.70834100  | 2.06905600  |
| C  | 3.91464900  | -1.87795400 | -1.15237800 |
| C  | 5.21664200  | -2.32556700 | -1.16919200 |
| C  | 5.84684000  | -2.64473700 | 0.03039200  |
| C  | 5.11446600  | -2.50428500 | 1.20594600  |
| C  | 3.81581600  | -2.05100300 | 1.14532700  |
| N  | 3.20702700  | -1.73022800 | -0.01442300 |
| H  | 6.87176700  | -2.99351000 | 0.04834000  |
| H  | 3.39629600  | -1.62416600 | -2.06875700 |

|   |             |             |             |
|---|-------------|-------------|-------------|
| H | 5.72870300  | -2.42710000 | -2.11820400 |
| H | 5.54433300  | -2.74990900 | 2.16931500  |
| H | 3.21925800  | -1.93468600 | 2.04163100  |
| C | -3.47675100 | -2.57914000 | -1.15730100 |
| C | -4.68760500 | -3.23222800 | -1.21108000 |
| C | -5.36225100 | -3.52344400 | -0.02861600 |
| C | -4.76509000 | -3.14299900 | 1.16991300  |
| C | -3.55159600 | -2.49282700 | 1.14606700  |
| N | -2.90117100 | -2.20068600 | 0.00193300  |
| H | -6.31843000 | -4.03134500 | -0.04076100 |
| H | -2.92709700 | -2.34030600 | -2.05924500 |
| H | -5.09416900 | -3.51369800 | -2.17475800 |
| H | -5.23371100 | -3.35298500 | 2.12355800  |
| H | -3.06113300 | -2.18635100 | 2.06165900  |

**Au<sub>3</sub>(IMD)<sub>1</sub>**

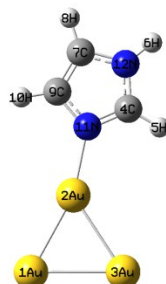

|    |             |             |             |
|----|-------------|-------------|-------------|
| Au | -1.53949000 | 1.23616700  | 0.00006700  |
| Au | 0.87381800  | 0.25904100  | 0.00003200  |
| Au | -1.22853500 | -1.46515400 | -0.00010100 |
| C  | 3.61438700  | -1.05956900 | 0.00066900  |
| H  | 3.17070400  | -2.04171700 | 0.00130500  |
| H  | 5.65328800  | -1.52922100 | 0.00064700  |
| C  | 5.13444900  | 0.53014200  | -0.00049500 |
| H  | 6.11593400  | 0.97181000  | -0.00088600 |
| C  | 3.89161000  | 1.08257700  | -0.00063200 |
| H  | 3.60608700  | 2.12049100  | -0.00118800 |
| N  | 2.95699700  | 0.07949200  | 0.00010900  |
| N  | 4.93638800  | -0.82442300 | 0.00032700  |

**Au<sub>3</sub>(IMD)<sub>3</sub>**

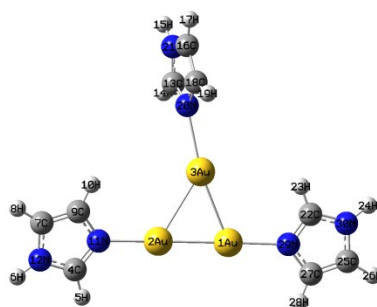

|    |             |             |             |
|----|-------------|-------------|-------------|
| Au | -1.46353500 | 0.99240800  | -0.03237900 |
| Au | 1.04026700  | 1.37132100  | -0.02193500 |
| Au | 0.02517600  | -1.30565900 | 0.06395900  |
| C  | 3.77571600  | 2.86846500  | -0.17365500 |
| H  | 3.28001200  | 3.79833900  | -0.40102300 |
| H  | 5.78715000  | 3.46743600  | -0.15011700 |
| C  | 5.37699200  | 1.42047200  | 0.24426000  |
| H  | 6.37846200  | 1.05483000  | 0.39471300  |
| C  | 4.16399500  | 0.80266300  | 0.28472300  |
| H  | 3.92723800  | -0.22924400 | 0.48367300  |
| N  | 3.17957700  | 1.71757000  | 0.02246700  |
| N  | 5.11027200  | 2.73201200  | -0.04868100 |

|   |             |             |             |
|---|-------------|-------------|-------------|
| C | 1.30755300  | -4.13939600 | -1.09210000 |
| H | 1.34056100  | -3.69444500 | -2.07460000 |
| H | 1.94250100  | -6.10230500 | -1.51733300 |
| C | 1.47297600  | -5.64171200 | 0.50296900  |
| H | 1.67276300  | -6.59642000 | 0.96049400  |
| C | 1.04110900  | -4.45199800 | 1.01025200  |
| H | 0.79249600  | -4.19935000 | 2.02863100  |
| N | 0.94423800  | -3.53007800 | 0.00643100  |
| N | 1.63826300  | -5.42454700 | -0.83975100 |
| C | -4.15594600 | -0.49974000 | 0.13564200  |
| H | -3.60704400 | -1.42183600 | 0.24650900  |
| H | -6.14335900 | -1.16687800 | 0.22220900  |
| C | -5.82895500 | 0.91889000  | -0.03401500 |
| H | -6.84955400 | 1.25935100  | -0.07286100 |
| C | -4.64215200 | 1.58146400  | -0.11738400 |
| H | -4.45678900 | 2.63465200  | -0.24572100 |
| N | -3.61315600 | 0.68574400  | -0.01018900 |
| N | -5.49960200 | -0.40160900 | 0.12677100  |

**S2:** Optimised Neutral structures of  $Au_3$ ,  $Au_3L_1$  and  $Au_3L_3$  (L : IMD, Py)

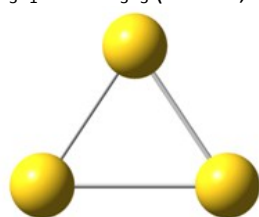

$Au_3:C_{2v}$

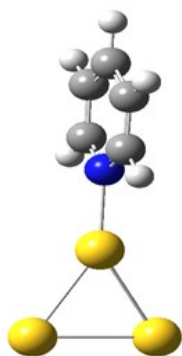

$Au_3(Py)_1:C_{2v}$

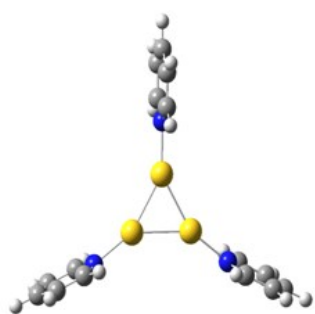

$Au_3(Py)_3:C_1$

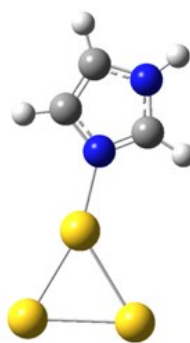

$Au_3(IMD)_1:C_s$

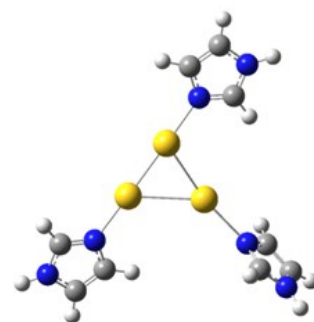

$Au_3(IMD)_3:C_1$

S3: Molecular Orbitals of  $\text{Au}_3^+$ ,  $\text{Au}_3\text{L}_1^+$  and  $\text{Au}_3\text{L}_3^+$  (L : IMD, Py)

$\text{Au}_3^+$

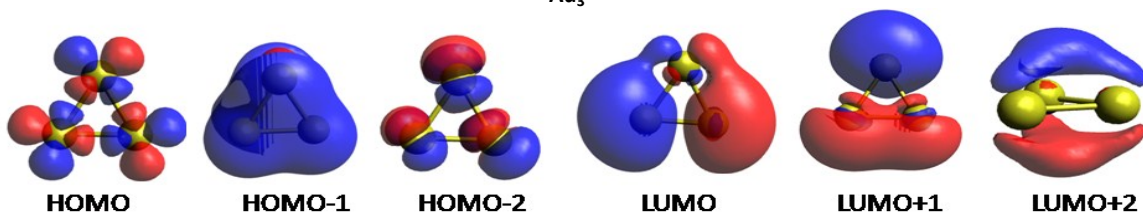

$\text{Au}_3(\text{py})_1^+$

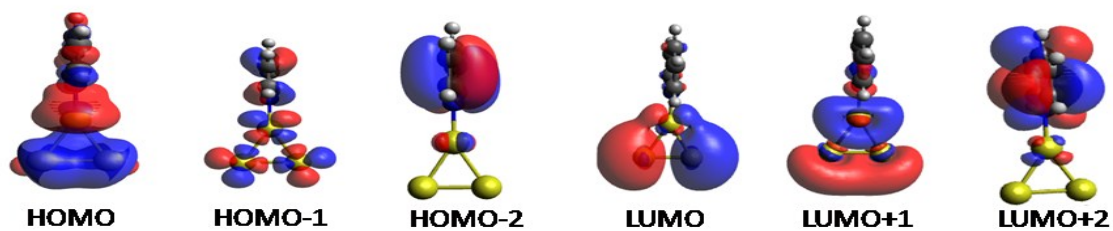

$\text{Au}_3(\text{py})_3^+$

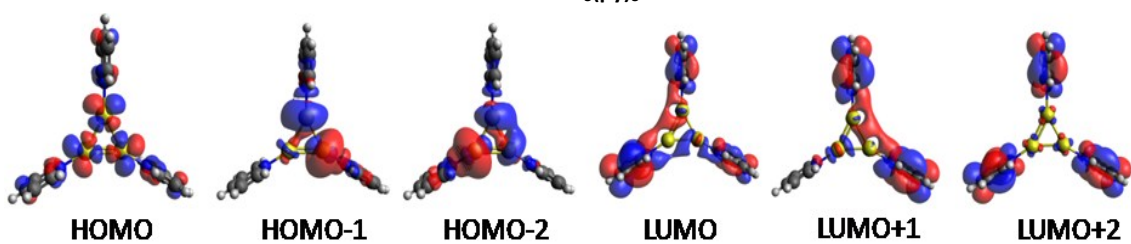

$\text{Au}_3(\text{IMD})_1^+$

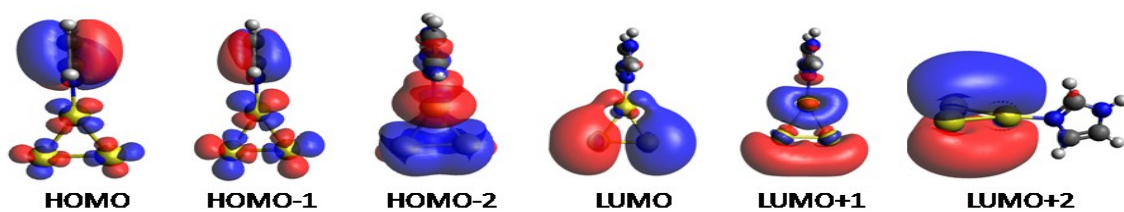

$\text{Au}_3(\text{IMD})_3^+$

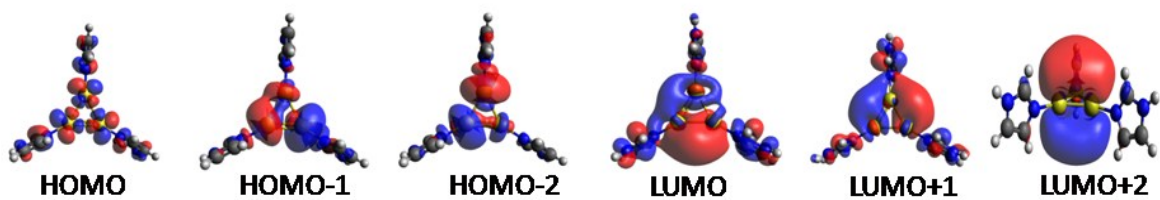

S4: DOS of Ligand substituted triatomic molecule  $Au_3L_1^+$  and  $Au_3L_3^+$  (L : IMD, Py)

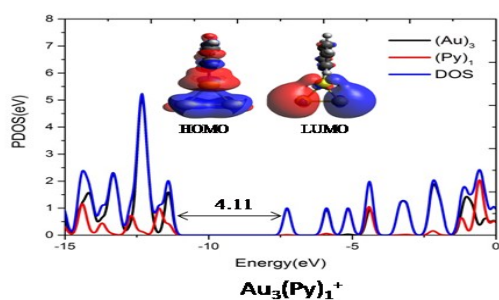

|      | <b><math>Au_3</math></b> | <b><math>(Py)_1</math></b> |
|------|--------------------------|----------------------------|
| L+5  | 99                       | 1                          |
| L+4  | 94                       | 6                          |
| L+3  | 0                        | 100                        |
| L+2  | 3                        | 97                         |
| L+1  | 94                       | 6                          |
| LUMO | 99                       | 1                          |
| HOMO | 74                       | 26                         |
| H-1  | 87                       | 13                         |
| H-2  | 2                        | 98                         |
| H-3  | 100                      | 0                          |
| H-4  | 100                      | 0                          |
| H-5  | 94                       | 6                          |

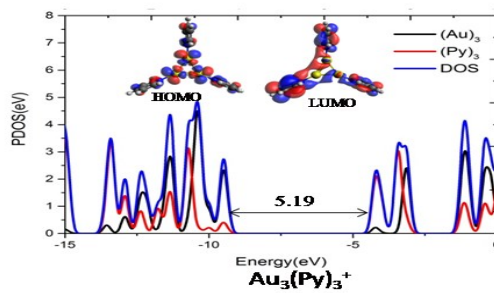

|      | <b><math>(Au)_3</math></b> | <b><math>(Py)_3</math></b> |
|------|----------------------------|----------------------------|
| L+5  | 0                          | 100                        |
| L+4  | 0                          | 100                        |
| L+3  | 0                          | 100                        |
| L+2  | 2                          | 98                         |
| L+1  | 11                         | 89                         |
| LUMO | 11                         | 89                         |
| HOMO | 87                         | 13                         |
| H-1  | 84                         | 16                         |
| H-2  | 84                         | 16                         |
| H-3  | 79                         | 21                         |
| H-4  | 95                         | 5                          |
| H-5  | 97                         | 3                          |

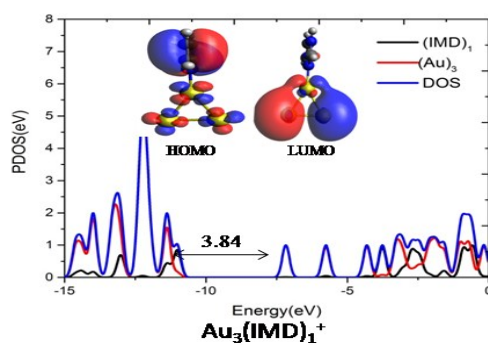

|      | <b><math>(Au)_3</math></b> | <b><math>(IMD)_1</math></b> |
|------|----------------------------|-----------------------------|
| L+5  | 72                         | 28                          |
| L+4  | 99                         | 1                           |
| L+3  | 8                          | 92                          |
| L+2  | 96                         | 4                           |
| L+1  | 95                         | 5                           |
| LUMO | 99                         | 1                           |
| HOMO | 15                         | 85                          |
| H-1  | 75                         | 25                          |
| H-2  | 82                         | 18                          |
| H-3  | 101                        | 0                           |
| H-4  | 100                        | 0                           |
| H-5  | 98                         | 2                           |

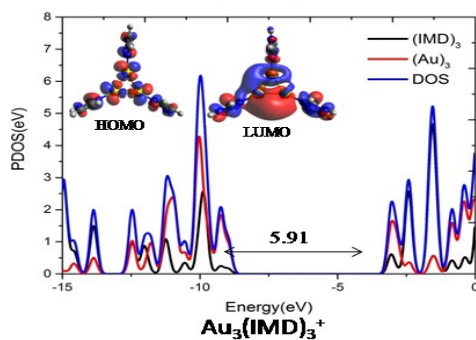

|      | <b><math>(Au)_3</math></b> | <b><math>(IMD)_3</math></b> |
|------|----------------------------|-----------------------------|
| L+5  | 18                         | 82                          |
| L+4  | 17                         | 83                          |
| L+3  | 2                          | 98                          |
| L+2  | 91                         | 9                           |
| L+1  | 70                         | 30                          |
| LUMO | 70                         | 30                          |
| HOMO | 84                         | 16                          |
| H-1  | 88                         | 12                          |
| H-2  | 88                         | 12                          |
| H-3  | 90                         | 10                          |
| H-4  | 35                         | 65                          |
| H-5  | 34                         | 66                          |

**S5:** Non linear optical property  $Au_3$ ,  $Au_3L_1$  and  $Au_3L_3$  (L : IMD, Py) by Different level of theory.

| Molecules     | PBE1PBE/Def2tzvp      |                                              | CAM-b3lyp/Def2tzvp    |                                              | M062X/SDD             |                                              |
|---------------|-----------------------|----------------------------------------------|-----------------------|----------------------------------------------|-----------------------|----------------------------------------------|
|               | Dipole moment (Debye) | Static First order hyperpolarizability (esu) | Dipole moment (Debye) | Static First order hyperpolarizability (esu) | Dipole Moment (Debye) | Static First order hyperpolarizability (esu) |
| $Au_3$        | 0.998                 | $10.871 \times 10^{-30}$                     | 1.355                 | $26.572 \times 10^{-30}$                     | 0.926                 | $2.162 \times 10^{-30}$                      |
| $Au_3(Py)_1$  | 8.744                 | $107.635 \times 10^{-30}$                    | 9.048                 | $24.961 \times 10^{-30}$                     | 9.219                 | $34.421 \times 10^{-30}$                     |
| $Au_3(Py)_3$  | 1.250                 | $322.979 \times 10^{-30}$                    | 4.416                 | $20213.012 \times 10^{-30}$                  | 2.577                 | $4582.949 \times 10^{-30}$                   |
| $Au_3(IMD)_1$ | 10.354                | $11.258 \times 10^{-30}$                     | 10.37                 | $13.865 \times 10^{-30}$                     | 10.745                | $14.965 \times 10^{-30}$                     |
| $Au_3(IMD)_3$ | 5.830                 | $37.586 \times 10^{-30}$                     | 6.101                 | $6.671 \times 10^{-30}$                      | 6.711                 | $24.187 \times 10^{-30}$                     |

**S6:** Binding Energy  $Au_3L_1$  and  $Au_3L_3$  (L : IMD, Py)

| Molecules     | Binding Energy (Kcal/mol) |
|---------------|---------------------------|
| $Au_3(Py)_1$  | -31.652                   |
| $Au_3(Py)_3$  | -56.869                   |
| $Au_3(IMD)_1$ | -33.939                   |
| $Au_3(IMD)_3$ | -51.02                    |

**S7:** Some Important Bond distances and bond angles of  $Au_3$ ,  $Au_3L_1$  and  $Au_3L_3$  (L : IMD, Py) (For Neutral and Cation Geometry).

| Systems       | Neutral                                  |                                                         |                                              | Cation                                   |                                                         |                                              |
|---------------|------------------------------------------|---------------------------------------------------------|----------------------------------------------|------------------------------------------|---------------------------------------------------------|----------------------------------------------|
|               | Bond Distances Between Au of $Au_3$ (A°) | Bond Distance between Au of $Au_3$ and N of Ligand (A°) | Bond Angles Between Au of $Au_3$ (In degree) | Bond Distances Between Au of $Au_3$ (A°) | Bond Distance between Au of $Au_3$ and N of Ligand (A°) | Bond Angles Between Au of $Au_3$ (In degree) |
| $Au_3$        | 2.61, 2.61, 2.91                         |                                                         | 56.15, 56.15, 67.68                          | 2.64, 2.64, 2.64                         |                                                         | 60.0, 60.0, 60.0                             |
| $Au_3(Py)_1$  | 2.65, 2.65, 2.71                         | 2.09                                                    | 59.16, 59.17, 61.67                          | 2.58, 2.67, 2.67                         | 2.08                                                    | 57.74, 61.12, 61.13                          |
| $Au_3(Py)_3$  | 2.62, 2.62, 2.68                         | 2.09, 2.09, 2.11                                        | 59.20, 59.22, 61.57                          | 2.63, 2.63, 2.63                         | 2.12, 2.12, 2.12                                        | 60.0, 60.0, 60.0                             |
| $Au_3(IMD)_1$ | 2.60, 2.72, 2.72                         | 2.09                                                    | 58.42, 60.79, 60.79                          | 2.58, 2.67, 2.67                         | 2.06                                                    | 57.79, 61.11, 61.11                          |
| $Au_3(IMD)_3$ | 2.56, 2.73, 2.86                         | 2.17, 2.17, 2.40                                        | 53.67, 60.65, 65.67                          | 2.63, 2.63, 2.63                         | 2.10, 2.10, 2.10                                        | 60.0, 60.0, 60.0                             |



**S8:** Vertical Ionisation Energies of studied Ligands and Complexes with Optimized Geometries calculated at PBE/Def2-TZVP level of theory

| Molecules                                                     | Vertical Ionisation Energy (VIE) (eV) |
|---------------------------------------------------------------|---------------------------------------|
| C <sub>6</sub> H <sub>6</sub>                                 | 9.27                                  |
| CH <sub>3</sub>                                               | 9.96                                  |
| CN                                                            | 15.21                                 |
| Py                                                            | 9.47                                  |
| IMD                                                           | 8.90                                  |
| Au <sub>3</sub> (C <sub>6</sub> H <sub>5</sub> ) <sub>3</sub> | 8.04                                  |
| Au <sub>3</sub> (CH <sub>3</sub> ) <sub>3</sub>               | 8.25                                  |
| Au <sub>3</sub> (CN) <sub>3</sub>                             | 11.54                                 |
|                                                               |                                       |
| Au <sub>3</sub> (Py) <sub>1</sub>                             | 5.84                                  |
| Au <sub>3</sub> (Py) <sub>3</sub>                             | 3.38                                  |
| Au <sub>3</sub> (IMD) <sub>1</sub>                            | 8.90                                  |
| Au <sub>3</sub> (IMD) <sub>3</sub>                            | 3.42                                  |

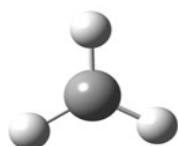

**CH<sub>3</sub>**

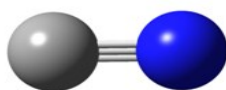

**CN**

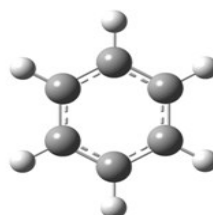

**C<sub>6</sub>H<sub>6</sub>**

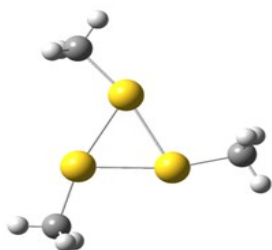

**Au<sub>3</sub>(CH<sub>3</sub>)<sub>3</sub>**

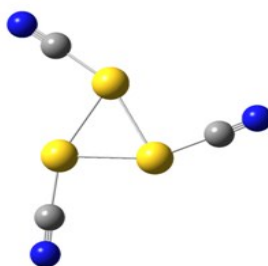

**Au<sub>3</sub>(CN)<sub>3</sub>**

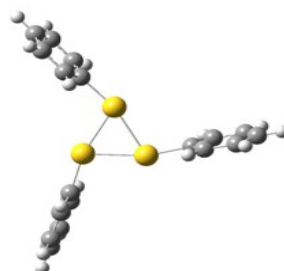

**Au<sub>3</sub>(C<sub>6</sub>H<sub>5</sub>)<sub>3</sub>**
